# Supplementary material for: Soliton dynamics of ring quantum cascade lasers with injected signal
Source: publisher site journal article supplement (doi:10.1515/nanoph-2020-0409), 2020-10-14
Supplement: Supplementary file 1 [file j_nanoph-2020-0409_suppl.pdf]

## Supplementary Material

### Analysis of the homogeneous stationary solution (HSS)

The HSS (5) of Eq. (3) is  $S$ -shaped if condition (6) holds. The values of the output intensity  $X$  at the turning points  $SN_1$  and  $SN_2$  are

$$X_{SN_{1,2}} = \frac{2(1 + \theta\Delta) \pm \sqrt{1 + 8\theta\Delta + \theta^2\Delta^2 - 3(\theta^2 + \Delta^2)}}{3(1 + \Delta^2)}. \quad (S1)$$

If  $\theta = \Delta$  the bistability condition is always satisfied, the left turning point  $SN_2$  touches the axis in  $X = 1$  and the lower branch is not accessible.

We study the stability of this solution with respect to fluctuations of the form  $\delta F(\tau, \eta) = \delta F_0 e^{\lambda\tau} e^{iK\eta}$ ,  $\delta F^*(\tau, \eta) = \delta F_0^* e^{\lambda\tau} e^{-iK\eta}$ . The characteristic equation for the eigenvalue  $\lambda$  is

$$\lambda^2 + c_1\lambda + c_0 = 0, \quad (S2)$$

with

$$c_1 = 2(2X - 1 + K^2), \quad (S3)$$

$$c_0 = 1 + \theta^2 - 4(1 + \theta\Delta)X + 3(1 + \Delta^2)X^2 + 2[2(1 - G\Delta)X + G\theta - 1]K^2 + (1 + G^2)K^4. \quad (S4)$$

Let us consider first the single-mode limit  $K = 0$ . The coefficient  $c_1$  is negative for  $X < 0.5$ . This means that the stationary solution is unstable due to a Hopf instability for  $0 \leq X \leq X_{IL}$  with  $X_{IL} = 0.5$ . The coefficient  $c_0$  coincides with  $dY/dX$ , and this is associated with the usual instability of the negative slope branch of the HSS.

In the general case  $K \neq 0$  the threshold for the Hopf instability is lowered which means that the most unstable mode is the resonant mode  $K = 0$  and the lower branch is still unstable from  $X = 0$  to  $X = 0.5$ . Instead, the condition  $c_0 = 0$  gives rise to a modulational (Turing) instability which affects the upper branch from the left turning point  $SN_2$  up to the bifurcation point MI, with

$$X_{MI} = (G + \theta) \frac{2(G + \Delta) + \sqrt{(1 + G^2)(1 + \Delta^2)}}{3(G^2 + \Delta^2) + 8G\Delta - G^2\Delta^2 - 1}. \quad (S5)$$

We assume that both the numerator and the denominator of this expression are positive. The positivity of the denominator sets some limits to the possible values of  $\Delta$  and  $G$ . For instance, if  $G = \Delta$  it must be  $\Delta > 2 - \sqrt{3}$ . An example of modulational instability domain is shown in Fig. S1 for  $\Delta = 2$  and  $G = 3$ . The wavevector  $K_{MI}$  associated with  $X_{MI}$  is the most unstable wavevector. In a cavity

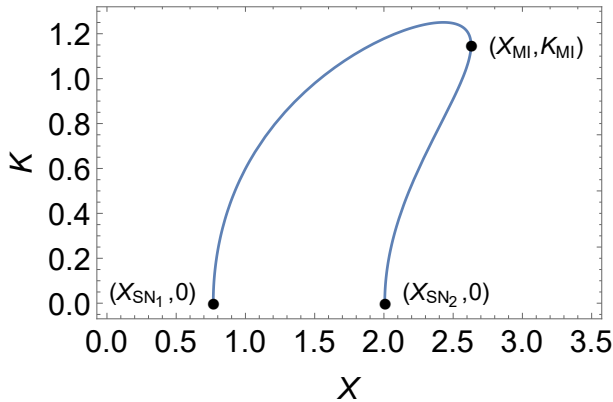

**Fig. S1:** Modulational instability domain of the HSS with respect to longitudinal modes of wavevector  $K$  for  $\Delta = 2$  and  $G = 3$ . For  $K = 0$  (single-mode limit) the solution is unstable only on the negative slope branch between the two turning points  $SN_1$  and  $SN_2$ . For  $K \neq 0$  the instability domain extends on the upper branch up to  $X_{MI}$  and the most unstable wavevector is  $K_{MI}$ .

of finite scaled length  $\eta_{\max}$  the wavevector  $K$  can take only values which are integer multiples of the minimum wavevector  $K_1 = 2\pi/\eta_{\max}$ . If  $K_{\bar{n}} = K_1 \bar{n}$  is the wavevector closest to  $K_{MI}$ , the Turing pattern that emerges when the bifurcation point MI is crossed will consist of  $\bar{n}$  rolls.

If the HSS is S-shaped the bifurcation point IL typically is placed on the lower branch and it coincides with the right turning point  $SN_1$  if  $X_{SN_1} = X_{IL} = 0.5$ . For a given  $\Delta$  this happens when  $\theta = \theta_{IL1}(\Delta)$  with

$$\theta_{IL1}(\Delta) = \Delta + \frac{\sqrt{1 + \Delta^2}}{2}. \quad (S6)$$

As  $\theta$  increases from  $\theta_{IL1}$  the point IL moves to the left along the lower branch. When  $\theta = \theta_{IL2}(\Delta)$  with

$$\theta_{IL2}(\Delta) = \frac{1}{4} \left[ 5\Delta + \Delta^3 + (1 + \Delta^2)\sqrt{5 + \Delta^2} \right], \quad (S7)$$

we have  $Y_{IL} = Y_{SN_2}$ , which means that the lower branch is stable between the two turning points.

The bifurcation point MI exists only if the HSS curve is S-shaped and it is placed on the right of the left turning point  $SN_2$ . MI coincides with  $SN_2$  when  $\theta = \theta_{MI2}(\Delta, G)$  with

$$\theta_{MI2}(\Delta, G) = \frac{4\Delta(1 + G^2) - G(1 + \Delta^2) + 2(G\Delta - 1)\sqrt{(1 + \Delta^2)(1 + G^2)}}{4 + (3 - \Delta^2)G^2}. \quad (S8)$$

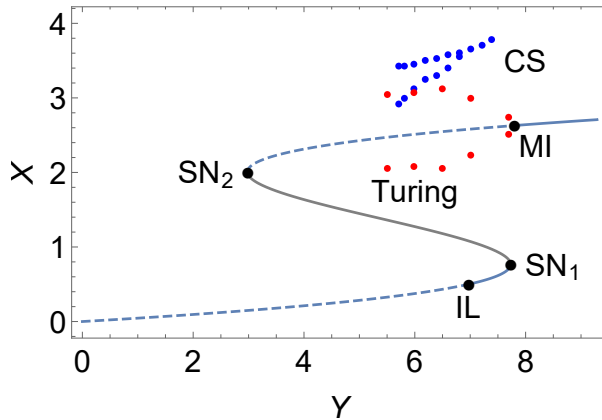

**Fig. S2:** Stationary homogeneous solution, where solid and dashed blue lines indicate stable and unstable configurations, cavity solitons branch (blue symbols), and Turing patterns branch (red symbols) for Eq.(3), with  $\Delta = 2$ ,  $G = 3$ ,  $\theta = 4.7$  (point **c** of Fig. 3), and  $\eta_{\max} = 200$  (figure obtained with the same parameters as in [14]).

For  $G = \Delta$  we obtain the simpler expression

$$\theta_{\text{MI}2}(\Delta, \Delta) = -2 + \frac{3}{2 - \Delta}. \quad (\text{S9})$$

This explains the vertical asymptote at  $\Delta = 2$  in Fig. 3. If we set  $G = \Delta + 1$  in Eq. (S8) we find that the vertical asymptote moves to  $\Delta = 1.867$ .

The input intensity  $Y_{\text{MI}}$  of the point MI coincides with the input intensity of the right turning point  $Y_{\text{SN}_1}$  when  $\theta = \theta_{\text{MI}1}(\Delta, G)$ , with

$$\begin{aligned} \theta_{\text{MI}1}(\Delta, G) &= \frac{f_1(\Delta, G) + 2(G\Delta - 1)\sqrt{(1 + \Delta^2)^3(1 + G^2)}}{f_2(\Delta, G)} \quad (\text{S10}) \\ f_1(\Delta, G) &= 2(3\Delta^4 + 8\Delta^3 + 2\Delta^2 - 1) - (7\Delta^4 - 18\Delta^2 + 7)G \\ &\quad + 2(\Delta^4 - 2\Delta^2 + 8\Delta - 3)G^2, \\ f_2(\Delta, G) &= 3\Delta^4 + 16\Delta^3 + 26\Delta^2 + 16\Delta + 7 + 4(1 + \Delta)^2(3 - \Delta^2)G \\ &\quad + 4(3 - \Delta^2)G^2. \end{aligned}$$

For  $G = \Delta$  we obtain the simpler expression

$$\theta_{\text{MI}1}(\Delta, \Delta) = 4 - \Delta - 16\frac{\Delta - 2}{\Delta^2 - 7}. \quad (\text{S11})$$

This explains the vertical asymptote at  $\Delta = \sqrt{7} \sim 2.646$  in Fig. 3 which shifts to  $\Delta = 2.343$  if we set  $G = \Delta + 1$ . From Eqs. (S9) and (S11) it follows that for  $G = \Delta$  the point MI is always placed on the right of  $\text{SN}_1$  if  $\Delta > \sqrt{7}$  for any  $\theta$ . If

instead  $\Delta < \sqrt{7}$ , as  $\theta$  increases from  $\theta_{\text{MI1}}$  the point MI moves to the left of the upper branch of the stationary solution but it can touch the left turning point  $\text{SN}_2$  only if  $\Delta < 2$  and  $\theta = \theta_{\text{MI2}}$ .

All these results are summarized in Fig. S2 which shows the HSS and its bifurcations for  $\Delta = 2$  and  $G = 3$ . Also shown are the branches of CSs and Turing pattern obtained assuming  $\eta_{\text{max}} = 100$  [14]. To the left of the bifurcation point IL the lower branch of the HSS which is the pedestal of the CS is unstable, therefore the peak intensity oscillates between a minimum and a maximum values, which are represented by the blue symbols.
